# Supplementary material for: Loss of Cyclin-Dependent Kinase Inhibitor Alters Oncolytic Adenovirus Replication and Promotes More Efficient Virus Production
Source: PubMed Central journal article supplement (PMC6025342; doi:10.3390/cancers10060202), 2018-06-15
Supplement: cancers-10-00202-s001.pdf [file cancers-10-00202-s001.pdf]

**Table S1.** Generated custom probe set for human adenovirus type 5

| Gene    | Targeted Region | Target Sequence                                                                                        |
|---------|-----------------|--------------------------------------------------------------------------------------------------------|
| E1A     | 470-570         | TCATTATCACCGGAGGAATACGGGGGACCCAGATATTATGTGTTTCGCTTTGCTATATGAGGACCTGTGGCATGTTTGTCTACAGTCCTGTGTCTGAACCT  |
| E1B_19K | 131-231         | GGAGGATTACAAGTGGGAATTTGAAGAGCTTTTGAAATCCTGTGGTGAGCTGTTTGATTCTTTGAATCTGGGTCACCAGGCGCTTTTCCAAGAGAAGGTC   |
| E1B_55K | 741-841         | GGTACGGTTTTCTGGCCAATACCAACCTTATCCTACACGGTGTAAAGCTTCTATGGGTTTAAACAATACCTGTGTGGAAGCCTGGACCGATGTAAGGGTTC  |
| IX      | 261-361         | AGTGCAGCTTCCCGTTCATCCGCCCGCGATGACAAGTTGACGGCTCTTTGGCACAATTGGATTCTTTGACCCGGGAACCTAATGTCGTTTCTCAGCAGC    |
| IVa2    | 688-788         | GAACCATTATACCGCAGTCTGGCACCCCTCCGCCCGCGCTTTGTAAAAATGGCCTATGACGATCTCATCCTGGAACACAACCTATGACGTTAGTGATCCCAG |
| pol     | 1323-1423       | CGCATCACACGCAACTTTATGCCTCGCGGGGAAAGATACTCTTCAACGATGTACCTTCGCCCTGCCAAATCCGCGTTCAAAAAGCGCACGGACTTTT      |
| pTP     | 278-378         | TTGCAACGACTACGTATTTGACTCGAGGGCTTACTCGCGTCTCAGGTACACCGAGCTCTCGCAGCCGGGTCACCAGACCGTTAACTGGTCCGTTATGGCC   |
| VA1_RNA | 24-124          | ATAAATTCGCAAGGGTATCATGGCGGACGACCGGGGTTTCGAGCCCCGTATCCGGCCGTCCGCCGTGATCCATGCGGTTACCGCCCCGCGTGTCGAACCCAG |
| VA2_RNA | 61-161          | CGAGTCTCGGACCGGCCGACTGCGGGCAACGGGGGTTTGCCTCCCCGTATGCAAGACCCCGCTTGCAAATTCCTCCGAAACAGGGACGAGCCCCCTT      |
| 52K     | 787-887         | ACAAGGTGGCCGCCATCAACTATTCCATGCTTAGCCTGGGCAAGTTTTACGCCCGCAAGATATAACCATACCCCTTACGTTCCCATAGACAAGGAGGTA    |
| pIIIa   | 1178-1278       | CCCTGGTTTCTACACCGGGGATTCGAGGTGCCCCGAGGGTAACGATGGATTCTCTGGGACGACATAGACGACAGCGTGTTTCCCCGCAACCGCAGACC     |

**Table S1.** (table continued).

| Gene     | Targeted Region | Target Sequence                                                                                       |
|----------|-----------------|-------------------------------------------------------------------------------------------------------|
| III      | 362-462         | CGACCTGAAAACCATCCTGCATACCAACATGCCAAATGTGAACGAGTTCATGTTTACCAATAAGTTTAAGGCGCGGGTGATGGTGTGCGCCTGCCTACT   |
| pVII     | 217-317         | CCACGCCGCCACCAGTGTCCACAGTGGACGCGGCCATTCAGACCGTGGTGC GCGGAGCCCGGCGCTATGCTAAAATGAAGAGACGGCGGAGGGCGGTAGC |
| V        | 186-286         | CGGGTACAGTGAAAAGGTGACGCGTAAAACGTGTTTTGCGACCCGGCACCACCGTAGTCTTTACGCCCGGTGAGCGCTCCACCCGCACCTACAAGCGCG   |
| pX       | 84-184          | CTGACGGGCGGCATGCGTCGTGCGCACCCGCGCGGCGCGCGTGCACCGTCGCATGCGCGGCGGTATCCTGCCCTCCTTATTCCACTGATCGCCG        |
| pVI      | 88-188          | TGAGCGGTGGCGCCTTCAGCTGGGGCTCGCTGTGGAGCGGCATTA AAAAATTCGGTTCACCGTTAAGAACTATGGCAGCAAGGCTGGAACAGCAGCAC   |
| hexon    | 2298-2398       | CTGGTACAAATGCTAGCTAACTACAACATTGGCTACCAGGGCTTCTATATCCCAGAGAGCTACAAGGACCGCATGTACTCCTTCTTTAGAACTTCCAGC   |
| protease | 189-289         | TCAAAAACATGCTACCTCTTTGAGCCCTTTGGCTTTTCTGACCAGCGACTCAAGCAGGTTTACCAGTTTGAGTACGAGTCACTCCTGCGCCGTAGCGCCA  |
| DBP      | 1049-1149       | TTCCGGCAAGTCTTGCGGCATGTTCTTCTCTGAAGGCGCAAAGGCTCAGGTGGCTTTTAAGCAGATCAAGGCTTTTATGCAGGGCGCTGTATCCTAACGCC |
| 100K     | 1521-1621       | TCAGGAATCTTGCCCGCCACCTGCTGTGCACTTCTTAGCGACTTTGTGCCATTAAGTACCGCGAATGCCCTCCGCCGCTTTGGGGCCACTGCTACCTTC   |
| 33K      | 460-560         | CCAACGAACCCGTATCGACCCGCGAGCTTAGAAACAGGATTTTTCCACTCTGTATGCTATATTTCAACAGAGCAGGGGCCAAGAACAAGAGCTGAAAAT   |
| 22K      | 367-467         | GCTACCGCTCATGGCGGGGCACAAGAACGCCATAGTTGCTTGCTTGCAAGACTGTGGGGGCAACATCTCCTTCGCCCGCGCTTTCTTCTTACCATCA     |

**Table S1.** (table continued).

| Gene          | Targeted Region | Target Sequence                                                                                       |
|---------------|-----------------|-------------------------------------------------------------------------------------------------------|
| pVIII         | 112-212         | CCCACATGATATCCCGGGTCAACGGAATCCGCGCCACCGAAACCGAATTCTCTTGGAACAGGCGGCTATTACCACCACACCTCGTAATAACCTTAATCC   |
| E3_12.5K      | 39-139          | CTGGTCCACTGTCGCCGCCACAAGTGCTTTGCCCGGACTCCGGTGAGTTTTGCTACTTTGAATTGCCCGAGGATCATATCGAGGGCCCGCGCACGGCG    |
| E3_CR1-alpha0 | 85-185          | TCTTTATICTTATACTAACGCTTCTCTGCCTAAGGCTCGCCGCTGCTGTGTGCACATTTGCATTTATTGTCAGCTTTTTAAACGCTGGGGTCGCCACCC   |
| E3_gp19K      | 0-100           | ATGATTAGGTACATAATCCTAGGTTTACTCACCTTGCCTCAGCCACGGTACCACCCAAAAGGTGGATTTTAAGGAGCCAGCCTGTAATGTTACATTCG    |
| 10.5_kD       | 23-123          | CGCCGCTACCGGACTTACATCTACCACAAAATACACCCCAAGTTTCTGCCCTTTGTCATAACTGGGATAACTTGGGCATGTGGTGGTTCTCCATAGCGCTT |
| E3_RID-alpha  | 158-258         | CACTGTGGTCATCGCCTTTATCCAGTGCATTGACTGGGTCTGTGTGCGCTTTGCATATCTCAGACACCATCCCCAGTACAGGGACAGGACTATAGCTGAG  |
| E3_RID-beta   | 145-245         | CCGAAGCCTGGTTATATGCAATCATCTCTGTTATGGTGTCTGCAGTACCATCTTAGCCCTAGCTATATATCCCTACCTTGACATTGGCTGGAAACGAAT   |
| E3_14.7K      | 87-187          | CGCATGAATCAAGAGCTCCAAGACATGGTTAACTTGCACCAGTGCAAAAGGGGTATCTTTGTCTGGTAAAGCAGGCCAAAGTCACCTACGACAGTAATA   |
| U_exon        | 5-105           | GATAGTGGGTGCGGATGGACAGGAACAGGAGGAAACTGACATTCCATTTAGATTGTGGAGAAAGTTTGCAGCCAGGAGGAAGCTGCAATACCAGAGCTGG  |
| fiber         | 592-692         | CACAAAATGAAAACCTAGGACTAAAAGTACGGGGCTCCTTTCATGTAACAGACGACCTAAACACTTTGACCGTAGCAACTGGTCCAGGTGTGACTATTAA  |
| E4_ORF6_7     | 321-421         | GTGTGGAATATAACACCTAAGAATATGTCTGTTACCCATGATATGATGCTTTTTAAGGCCAGCCGGGGAGAAAGGACTGTGTACTCTGTGTGTTGGGAGG  |
| ACTB          | 1062-1162       | ATCAAGATCATTGCTCCTCTGAGCGCAAGTACTCCGTGTGGATCGGCGGCTCCATCCTGGCCTCGCTGTCCACCTTCCAGCAGATGTGGATCAGCAAGC   |
| CLTC          | 290-390         | GGGTATCAACCCAGCAAACATTGGCTTCAGTACCCTGACTATGGAGTCTGACAAATTCATCTGCATTAGAGAAAAAGTAGGAGAGCAGGCCAGGTGGTA   |
| HPRT1         | 354-454         | TAGCCCTCTGTGTGCTCAAGGGGGCTATAAATTCTTTGCTGACCTGCTGGATTACATCAAAGCACTGAATAGAAATAGTGATAGATCCATTCCTATGAC   |
